# Supplementary material for: Health-Related Internet Use by Children and Adolescents: Systematic Review
Source: PubMed Central journal article supplement (PMC5904452; doi:10.2196/jmir.7731), 2018-04-03
Supplement: jmir_v20i4e120_app1.pdf [file jmir_v20i4e120_app1.pdf]

Appendix 1. Summary of included studies.

| First author, year         | Country       | Number of participants | Characteristics of adolescents |                                                                                                                            |                    | Perceptions about health-related Internet use (HRIU) | Evidence (key findings)                                                                                                                                                                                                                                                                                                                                                                                                                                                                                                                        | Ever use Internet for health (>50%) | Associated factors    |
|----------------------------|---------------|------------------------|--------------------------------|----------------------------------------------------------------------------------------------------------------------------|--------------------|------------------------------------------------------|------------------------------------------------------------------------------------------------------------------------------------------------------------------------------------------------------------------------------------------------------------------------------------------------------------------------------------------------------------------------------------------------------------------------------------------------------------------------------------------------------------------------------------------------|-------------------------------------|-----------------------|
|                            |               |                        | Age (years or graders)         | Demographics                                                                                                               | Medical conditions |                                                      |                                                                                                                                                                                                                                                                                                                                                                                                                                                                                                                                                |                                     |                       |
| Manganello et al, 2016 [1] | United States | 48                     | 14-17 years                    | Mostly female (70%), 7th-9th grade (30%) and 10-12th grade (70%), African American adolescents living in an urban location | None               | Negative                                             | <ul style="list-style-type: none"> <li>65% low health literacy group (compared with 35% having adequate health literacy group)</li> <li>Low health literacy group reported greater problems with understanding information they found on the Internet, requiring assistance (33% low vs 8% high) and more likely to rate health information online as accurate (28% low vs 14% high), suggesting there may be a lack of skills for evaluating credibility</li> <li>Associated factor: youth with low health literacy less likely to</li> </ul> | -                                   | Health literacy level |

|                           |               |     |             |                                                                                                                   |                    |          |                                                                                                                                                                                                                                                                                                                                                                                                                                                                                                                                           |     |      |
|---------------------------|---------------|-----|-------------|-------------------------------------------------------------------------------------------------------------------|--------------------|----------|-------------------------------------------------------------------------------------------------------------------------------------------------------------------------------------------------------------------------------------------------------------------------------------------------------------------------------------------------------------------------------------------------------------------------------------------------------------------------------------------------------------------------------------------|-----|------|
|                           |               |     |             |                                                                                                                   |                    |          | prefer general Internet use and more likely to need help understating health information obtained on their own                                                                                                                                                                                                                                                                                                                                                                                                                            |     |      |
| Johnson et al, 2015 [2]   | United States | 134 | 14-19 years | Mostly female (83,6%), Caucasian (81.3%), living with two parents in an urban location                            | Juvenile arthritis | Positive | <ul style="list-style-type: none"> <li>Youth with low psychosocial quality of life (PSQL) report more frequent use of SNSs than their peers with high PSQL; more frequent searching for information about sensitive health topics; and high interest in using additional online tools to address unmet needs and to connect with other teens with juvenile arthritis</li> <li>74.5% prefer online support group than in-person support groups</li> <li>91% interested in using a website that is just for teens with arthritis</li> </ul> | Yes | PSQL |
| Wetterlin et al, 2014 [3] | Canada        | 521 | 17-24 years | Mostly female (76.6%), East or Southeast Asian (44%) or European or Caucasian (35.5%), living in British Columbia | None               | Positive | <ul style="list-style-type: none"> <li>Likelihood of visiting Web-based mental health resources during a difficult time in life: 82.9% information-based website with mainly text, 76.8% social media websites</li> </ul>                                                                                                                                                                                                                                                                                                                 | -   | -    |

|                           |                |     |             |                                                                                                                                 |                          |                                    |                                                                                                                                                                                                                                                                                                                                |    |        |
|---------------------------|----------------|-----|-------------|---------------------------------------------------------------------------------------------------------------------------------|--------------------------|------------------------------------|--------------------------------------------------------------------------------------------------------------------------------------------------------------------------------------------------------------------------------------------------------------------------------------------------------------------------------|----|--------|
|                           |                |     |             | (86%) and currently in school (87.3%)                                                                                           |                          |                                    | <ul style="list-style-type: none"> <li>Likelihood of contacting a human within a Web-based mental health resource: 83.9% online professional (eg, therapist or coach)</li> </ul>                                                                                                                                               |    |        |
| Fergie et al, 2013 [4]    | United Kingdom | 34  | 14-18 years | Mostly female (70.6%), school pupils or university students, living in an urban area                                            | None                     | Not applicable (N/A) (qualitative) | <ul style="list-style-type: none"> <li>Perceived disadvantages and advantages of health content online are identified</li> </ul>                                                                                                                                                                                               |    |        |
| Henderson et al, 2013 [5] | United Kingdom | 105 | 11-18 years | Male (58%) and female (42%), most had experienced some form of pain in the last 3 months (80%), living in an urban area         | None                     | Negative                           | <ul style="list-style-type: none"> <li>13.3%=HRIU related to pain management</li> <li>Although majority (82%) indicate between 1 to 4 hours/day of Internet use, seeking information online about their pain coping, information, and management is not primary strategy of a healthy adolescent population in pain</li> </ul> | No | Gender |
| Nordfeldt et al, 2013 [6] | Sweden         | 24  | 10-17 years | Male (54%) and female (46%), living in catchment area of a county hospital in the South-East of Sweden, either in compulsory or | Type 1 diabetes mellitus | N/A (qualitative)                  | <ul style="list-style-type: none"> <li>Primary source for information is parents or significant others</li> </ul>                                                                                                                                                                                                              | -  | -      |

|                          |                |                              |                 |                                                                           |                                  |          |                                                                                                                                                                                                                                                                                                                                                                                                                                                                                                                                                                                                                                              |     |                                                                                                        |
|--------------------------|----------------|------------------------------|-----------------|---------------------------------------------------------------------------|----------------------------------|----------|----------------------------------------------------------------------------------------------------------------------------------------------------------------------------------------------------------------------------------------------------------------------------------------------------------------------------------------------------------------------------------------------------------------------------------------------------------------------------------------------------------------------------------------------------------------------------------------------------------------------------------------------|-----|--------------------------------------------------------------------------------------------------------|
|                          |                |                              |                 | secondary school, all had Internet access at home                         |                                  |          |                                                                                                                                                                                                                                                                                                                                                                                                                                                                                                                                                                                                                                              |     |                                                                                                        |
| Neumark et al, 2013 [7]  | Israel         | 6728                         | 7th-12th grades | Male (48.9%) and female (51.1%), Jewish (71.8%) and Arab (28.2%) students | None                             | Neutral  | <ul style="list-style-type: none"> <li>• 52.1% reported having sought online health information in the past year</li> <li>• Trust in online health information: high 15%, moderate 68.2%, low 16.8%</li> <li>• Perceived Internet skill levels: high 37%, moderate 36.9%, low 26.1%</li> <li>• Likelihood of HRIU: Arab students (63%), Jews (48%)</li> <li>• Reasons for not seeking online health information: preference to receive information from a health professional, lack of interest, lack of trust, insufficient English proficiency, lack of time and privacy, limited access, expense, insufficient Internet skills</li> </ul> | Yes | Age, frequency of Internet use, level of trust, Internet skills, medical condition, school performance |
| Stephens et al, 2013 [8] | United Kingdom | 15 (interview) + 50 (survey) | 10-16 years     | Majority use social networking sites (SNSs) (76%)                         | Undergoing orthodontic treatment | Negative | <ul style="list-style-type: none"> <li>• 8% = use Internet for orthodontic-related information</li> <li>• Preferred source of information: health care providers (84%),</li> </ul>                                                                                                                                                                                                                                                                                                                                                                                                                                                           | No  | -                                                                                                      |

|                          |               |     |             |                                                                                                                                                                                                            |      |          |                                                                                                                                                                                                                                                                                                                                   |     |                                                |
|--------------------------|---------------|-----|-------------|------------------------------------------------------------------------------------------------------------------------------------------------------------------------------------------------------------|------|----------|-----------------------------------------------------------------------------------------------------------------------------------------------------------------------------------------------------------------------------------------------------------------------------------------------------------------------------------|-----|------------------------------------------------|
|                          |               |     |             |                                                                                                                                                                                                            |      |          | peers (66%), parents (60%), leaflets (64%), Internet (8%)                                                                                                                                                                                                                                                                         |     |                                                |
| Gaskin et al, 2012 [9]   | United States | 79  | 13-18 years | Mostly male (84%), Hispanic (70%), youth detained in a juvenile detention facility, predominantly underserved, minority communities, high level of access to Internet                                      | None | Positive | <ul style="list-style-type: none"> <li>90% believe access to health information on website is useful</li> <li>85% have no concerns about the privacy of their health information online on password-protected sites</li> </ul>                                                                                                    | -   | -                                              |
| Magee et al, 2012 [10]   | United States | 32  | 16-24 years | Male (53%), female (37.5%), and transgender (9.4%); African American (40.6%), Hispanic or Latino (25%), Caucasian (21.8%), Asian (3%), and multiracial (9%); lesbian, gay, bisexual, and transgender youth | None | Positive | <ul style="list-style-type: none"> <li>75% online searches for sexual health information as common activity</li> <li>Overall, seek facts and statistics about sexually transmitted infections (STIs) and human immunodeficiency virus (HIV) online (&gt;70%) but few on the broader aspects of sexual health (&lt;25%)</li> </ul> | Yes | Fear of acquiring sexually transmitted disease |
| Ghaddar et al, 2012 [11] | United States | 261 | 14-20 years | Mostly female (60%), Hispanic (84%), high school students; economically disadvantaged (58%)                                                                                                                | None | Positive | <ul style="list-style-type: none"> <li>81% had checked health information online</li> <li>71% very likely to search the Internet for information on health</li> </ul>                                                                                                                                                             | Yes | Health literacy                                |

|                                  |               |     |             |                                                                                                                                                                                                                                                |      |                        |                                                                                                                                                                                                                         |     |                                                                                    |
|----------------------------------|---------------|-----|-------------|------------------------------------------------------------------------------------------------------------------------------------------------------------------------------------------------------------------------------------------------|------|------------------------|-------------------------------------------------------------------------------------------------------------------------------------------------------------------------------------------------------------------------|-----|------------------------------------------------------------------------------------|
|                                  |               |     |             |                                                                                                                                                                                                                                                |      |                        | <ul style="list-style-type: none"> <li>59% sought health information for family's health online</li> </ul>                                                                                                              |     |                                                                                    |
| Selkie et al, 2011 [12]          | United States | 29  | 14-19 years | Mostly female (65.5%); heterosexual (61%); sexual experience (58.6%)                                                                                                                                                                           | None | N/A (HRIU-qualitative) | <ul style="list-style-type: none"> <li>Common themes to the resources for sexual health information online are identified: accessibility, trustworthiness, and confidentiality, and personal comfort</li> </ul>         | -   | -                                                                                  |
| Barman-Adhikari et al, 2011 [13] | United States | 169 | 13-24 years | Mostly male (68.2%), heterosexual (68.9%), gay or lesbian or bisexual (31.1%); African American (31%), Caucasian (26.9%), mixed race (18.5%), Hispanic or Latino (12.6%), and other (10.8%); runaway and homeless adolescents in an urban area | None | N/A                    | <ul style="list-style-type: none"> <li>61% use Internet to find answers to general health questions</li> <li>&lt;50% look for information about HIV or other STIs and 40% information about sex or sexuality</li> </ul> | Yes | Gender, race or ethnicity, frequency of Internet use; personal access to computers |

|                            |               |                                 |             |                                                                                                                                                                                                                  |      |          |                                                                                                                                                                                                                                                    |     |                              |
|----------------------------|---------------|---------------------------------|-------------|------------------------------------------------------------------------------------------------------------------------------------------------------------------------------------------------------------------|------|----------|----------------------------------------------------------------------------------------------------------------------------------------------------------------------------------------------------------------------------------------------------|-----|------------------------------|
| Mustanski et al, 2011 [14] | United States | 329 (including 16 interviewees) | 18-24 years | All male born, male identified, Caucasian (48%), African American (20%), Hispanic or Latino (20%), other (12%); men who have sex with men identified as gay (49%), bisexual (8%), queer (3%), heterosexual (39%) | None | N/A      | <ul style="list-style-type: none"> <li>88% used the Internet to find HIV or STI-related information</li> </ul>                                                                                                                                     | Yes | Race or ethnicity and gender |
| Rushing et al, 2011 [15]   | United States | 405                             | 13-21 years | Male (43%) and female (57%), American Indian, American Native youth living in rural (58%) and urban (39%) communities                                                                                            | None | N/A      | <ul style="list-style-type: none"> <li>76% used the Internet to get information on a health topic</li> </ul>                                                                                                                                       | Yes | Gender and age               |
| Buhi et al, 2009 [16]      | United States | 34                              | 18-19 years | Mostly female (67.6%), 1st year under graduate students, Caucasian, reported as experienced Internet users                                                                                                       | None | Positive | <ul style="list-style-type: none"> <li>65% Internet is the predominant source for seeking health-related information</li> <li>73.5% ever look online for information on specific diseases or medical problems, treatment, or procedures</li> </ul> | Yes | -                            |
| Tercyak et al, 2009 [17]   | United States | 332                             | 11-12 years | Mostly female (70%), African American (44%) or Caucasian (39%),                                                                                                                                                  | None | Neutral  | <ul style="list-style-type: none"> <li>Moderate level of willingness to engage in electronic health (eHealth) promotion</li> </ul>                                                                                                                 | -   | -                            |

|                         |         |      |             |                                                                                                |      |           |                                                                                                                                                                                                                                                                                                                                                                                        |   |                                   |
|-------------------------|---------|------|-------------|------------------------------------------------------------------------------------------------|------|-----------|----------------------------------------------------------------------------------------------------------------------------------------------------------------------------------------------------------------------------------------------------------------------------------------------------------------------------------------------------------------------------------------|---|-----------------------------------|
|                         |         |      |             | living in predominantly middle class income areas                                              |      |           | <ul style="list-style-type: none"> <li>• &lt;20% are unwilling to engage in any eHealth promotion activity</li> </ul>                                                                                                                                                                                                                                                                  |   |                                   |
| Ybarra et al, 2008 [18] | Uganda  | 500  | 12-18 years | Mostly male (61%), secondary school students (8th-11th grade) living in rural locations        | None | Negative- | <ul style="list-style-type: none"> <li>• Source of health information: parents or other adults (81%) and the Internet (38%)</li> </ul>                                                                                                                                                                                                                                                 | - | -                                 |
| Nwagwu, 2007 [19]       | Nigeria | 1145 | 13-19 years | All female, currently in school or dropped out of school, living in an urban area <sup>a</sup> | None | N/A       | <ul style="list-style-type: none"> <li>• Main source of health information in in-school girls: parents (66.2%) and teachers (56.2%)</li> <li>• Main source of health information in out-of-school girls: friends (63.1%) and the Internet (55.2%)</li> <li>• More out-of-school than in-school girls use the Internet to obtain information about their reproductive health</li> </ul> | - | In-school or out-of-school status |

Abbreviation: AA, African American; DM, diabetes mellitus; HIV, human immunodeficiency virus; HS, high school; LGBT, lesbian, gay, bisexual, and transgender; MSM, men who have sex with men; PS-QL, psychosocial quality of life; SNS, social networking sites; STI, sexually-transmitted infection; UG, undergraduate; UK, United Kingdom; USA, United States of America; yrs, years.

<sup>a</sup> The study states that participants were both educated and affluent.



## References

1. Manganello JA, Sojka CJ. An exploratory study of health literacy and African American adolescents. *Compr Child Adolesc Nurs* 2016 Jul;39(3):221-239. doi: 10.1080/24694193.2016.1196264
2. Johnson KR, Fuchs E, Horvath KJ, Scal P. Distressed and looking for help: Internet intervention support for arthritis self-management. *J Adolesc Health* 2015 Feb;56(6):666-671. doi:10.1016/j.jadohealth.2015.02.019. PMID:26003583
3. Wetterlin FM, Mar MY, Neilson EK, Werker GR, Krausz M. eMental health experiences and expectations: a survey of youths' Web-based resource preferences in Canada. *J Med Internet Res* 2014 Dec;16(12):e293. doi:10.2196/jmir.3526. PMID:25519847
4. Fergie G, Hunt K, Hilton S. What young people want from health-related online resources: a focus group study. *J Youth Stud* 2013 Aug;16(5):579-596. doi:10.1080/13676261.2012.744811. PMID:24748849
5. Henderson EM, Keogh E, Rosser BA, Eccleston C. Searching the Internet for help with pain: adolescent search, coping, and medication behaviour. *Br J Health Psychol* 2013 Feb;18(1):218-232. doi:10.1111/bjhp.12005. PMID:23126577
6. Nordfeldt S, Angarne-Lindberg T, Nordwall M, Ekberg J, Bertero C. As facts and chats go online, what is important for adolescents with type 1 diabetes? *PLoS One* 2013 Jun 21;8(6):e67659. doi:10.1371/journal.pone.0067659. PMID:23805322
7. Neumark Y, Lopez-Quintero C, Feldman BS, Hirsch Allen AJ, Shtarkshall R. Online health information seeking among Jewish and Arab adolescents in Israel: results from a national school survey. *J Health Commun* 2013;18(9):1097-1115. doi: 10.1080/10810730.2013.778360. PMID: 23829662
8. Stephens R, Ryan FS, Cunningham SJ. Information-seeking behavior of adolescent orthodontic patients. *Am J Orthod Dentofacial Orthop* 2013 Mar;143(3):303-309. doi:10.1016/j.ajodo.2012.10.018. PMID:23452963
9. Gaskin GL, Longhurst CA, Anoshiravani A. Internet access and attitudes toward online personal health information among detained youth. *Pediatrics* 2012 Nov;130(5):914-17. doi:10.1542/peds.2012-1653. PMID:23090346
10. Magee JC, Bigelow L, Dehaan S, Mustanski BS. Sexual health information seeking online: a mixed-methods study among lesbian, gay, bisexual, and transgender young people. *Health Educ Behav* 2012 Jun;39(3):276-289. doi:10.1177/1090198111401384. PMID: 21490310

11. Ghaddar SF, Valerio MA, Garcia CM, Hansen L. Adolescent health literacy: the importance of credible sources for online health information. *J Sch Health* 2012 Jan;82(1):28-36. doi:10.1111/j.1746-1561.2011.00664.x. PMID:22142172
12. Selkie EM, Benson M, Moreno M. Adolescents' views regarding uses of social networking Websites and text messaging for adolescent sexual health education. *Am J Health Educ* 2011 Jul;42(4):205-12. PMID:22229150
13. Barman-Adhikari A, Rice E. Sexual health information seeking online among runaway and homeless youth. *J Soc Social Work Res* 2011 Jun;2(2):88-103. doi:[10.5243/jsswr.2011.5](https://doi.org/10.5243/jsswr.2011.5). PMID: 22247795
14. Mustanski B, Lyons T, Garcia SC. Internet use and sexual health of young men who have sex with men: a mixed-methods study. *Arch Sex Behav* 2011;40(2):289-300. doi: 10.1007/s10508-009-9596-1. PMID: 20182787
15. Rushing SC, Stephens D. Use of media technologies by Native American teens and young adults in the Pacific Northwest: exploring their utility for designing culturally appropriate technology-based health interventions. *J Prim Prev* 2011;32(3-4):135-145. doi:10.1007/s10935-011-0242-z. PMID: 21805055
16. Buhi ER, Daley EM, Fuhrmann HJ, Smith SA. An observational study of how young people search for online sexual health information. *J Am Coll Health* 2009 Sep-Oct;58(2):101-11. doi:10.1080/07448480903221236. PMID:19892646
17. Tercyak KP, Abraham AA, Graham AL, Wilson LD, Walker LR. Association of multiple behavioral risk factors with adolescents' willingness to engage in eHealth promotion. *J Pediatr Psychol* 2009 Jun;34(5):457-469. doi:10.1093/jpepsy/jsn085. PMID:18723566
18. Ybarra ML, Emenyonu N, Nansera D, Kiwanuka J, Bangsberg DR. Health information seeking among Mbararan adolescents: results from the Uganda Media and You survey. *Health Educ Res* 2008 Apr;23(2):249-258. doi:[10.1093/her/cym026](https://doi.org/10.1093/her/cym026). PMID: 17639121
19. Nwagwu WE. The Internet as a source of reproductive health information among adolescent girls in an urban city in Nigeria. *BMC Public Health* 2007 Dec;7(1):354. doi:10.1186/1471-2458-7-354. PMID:18096032
