# Supplementary material for: Health-Related Internet Use by Children and Adolescents: Systematic Review
Source: PubMed Central journal article supplement (PMC5904452; doi:10.2196/jmir.7731), 2018-04-03
Supplement: jmir_v20i4e120_app3.pdf [file jmir_v20i4e120_app3.pdf]

### Appendix 3. Methodological evaluation of study quality

| First author, year         | Research design                              | Conceptual framework | Sampling                                                                                                                              | Data collection method and instrument                                                              | Analysis method                                                                         | Threats to validity                                               |
|----------------------------|----------------------------------------------|----------------------|---------------------------------------------------------------------------------------------------------------------------------------|----------------------------------------------------------------------------------------------------|-----------------------------------------------------------------------------------------|-------------------------------------------------------------------|
| Manganello et al, 2016 [1] | Qualitative and Quantitative                 | None                 | Convenience sampling (community organizations)                                                                                        | Semistructured interviews                                                                          | Semiquantitative analysis                                                               | Self-report; Limited generalizability                             |
| Johnson et al, 2015 [2]    | Quantitative; Cross-sectional                | None                 | Convenience sampling across multiple sites (clinics, advocacy organizations' websites, and Facebook)                                  | Online survey using MyRheum, Illness Intrusiveness Scale, and investigator-developed questionnaire | Descriptive statistics, <i>t</i> test, chi-square test                                  | Self-report and self-selection bias; heterogeneous sample         |
| Wetterlin et al, 2014 [3]  | Quantitative; Cross-sectional                | None                 | Convenience sampling across multiple sites (Facebook and Twitter, online university student communities, and community organizations) | Online survey using Bell Youth Impact Survey and investigator-developed questionnaires             | Descriptive statistics and descriptive analysis                                         | Self-report and self-selection bias; Limited generalizability     |
| Fergie et al, 2013 [4]     | Qualitative                                  | None                 | Purposive and snowball sampling across multiple sites (university course conveners and community youth group leaders)                 | Focus groups                                                                                       | Thematic analysis using a constant comparison method                                    | Self-selection bias; Limited generalizability (homogenous sample) |
| Henderson et al, 2013 [5]  | Quantitative; Cross-sectional; Correlational | None                 | Convenience sampling across multiple sites (four schools)                                                                             | Online survey using investigator-developed questionnaires, pain coping questionnaire, etc          | Descriptive statistics; chi-square test, correlational analyses (Pearson <i>r</i> test) | Self-report; Limited generalizability                             |
| Nordfeldt et al, 2013 [6]  | Qualitative                                  | None                 | Purposive sampling (catchment area of a county hospital)                                                                              | Focus groups                                                                                       | Qualitative inductive analysis; content analysis                                        | Self-selection bias; Limited generalizability                     |
| Neumark et al, 2013 [7]    | Quantitative Cross-                          | None                 | Stratified sampling across multiple sites (five schools)                                                                              | Survey                                                                                             | Multivariate regression                                                                 | Self-report                                                       |

|                                  |                                              |                                                                                 |                                                                          |                                                                                                                                                       |                                                                                                                                   |                                                                                      |
|----------------------------------|----------------------------------------------|---------------------------------------------------------------------------------|--------------------------------------------------------------------------|-------------------------------------------------------------------------------------------------------------------------------------------------------|-----------------------------------------------------------------------------------------------------------------------------------|--------------------------------------------------------------------------------------|
|                                  | sectional;<br>Correlational                  |                                                                                 |                                                                          |                                                                                                                                                       |                                                                                                                                   |                                                                                      |
| Stephens et al, 2013 [8]         | Qualitative and quantitative                 | None                                                                            | Purposive sampling at a single site (hospital)                           | Semistructured interviews; Survey using investigator-developed questionnaire                                                                          | Content analysis (framework approach)                                                                                             | Self-report and self-selection bias; Limited generalizability                        |
| Gaskin et al, 2012 [9]           | Quantitative; Cross-sectional                | None                                                                            | Convenience sampling at a single site (juvenile detention facility)      | Interviews using an investigator-developed questionnaire                                                                                              | Descriptive statistics                                                                                                            | Self-report and self-selection bias; Limited generalizability because of single site |
| Magee et al, 2012 [10]           | Mixed methods; Cross-sectional               | None                                                                            | Convenience sampling across multiple sites                               | Interviews                                                                                                                                            | Descriptive thematic analysis (inductive approach)                                                                                | Limited generalizability                                                             |
| Ghaddar et al, 2012 [11]         | Quantitative; Cross-sectional; Correlational | None                                                                            | Random sampling across multiple sites (four schools)                     | Online survey using investigator-developed questionnaires, General Self-Efficacy Scale, eHealth (electronic health) Literacy Scale, Newest Vital Sign | Descriptive statistics, Univariate tests (chi-square and <i>t</i> tests); multivariate analyses (linear and logistic regressions) | Self-report; Limited generalizability (single state)                                 |
| Selkie et al, 2011 [12]          | Mixed methods; Cross-sectional               | Grounded theory                                                                 | Purposive sampling across multiple sites (community centers and schools) | Focus groups; paper survey using Youth Risk Behavior Survey, the National Health and Nutrition Examination Survey                                     | Descriptive analysis; Constant comparative method                                                                                 | Self-report and self-selection bias; Limited generalizability                        |
| Barman-Adhikari et al, 2011 [13] | Quantitative; Cross-sectional                | Conceptual model for online sexual health information seeking among runways and | Convenience sampling at a single site (drop-in agency)                   | Survey                                                                                                                                                | Logistic regression                                                                                                               | Self-report; Limited generalizability                                                |

|                            |                                                            |                                                                                                             |                                                                  |                                                                                                                                                                                                                         |                                                 |                                                                      |
|----------------------------|------------------------------------------------------------|-------------------------------------------------------------------------------------------------------------|------------------------------------------------------------------|-------------------------------------------------------------------------------------------------------------------------------------------------------------------------------------------------------------------------|-------------------------------------------------|----------------------------------------------------------------------|
|                            |                                                            | homeless youths<br>(based on Andersen<br>behavioral model and<br>Pescosolido's<br>network episode<br>model) |                                                                  |                                                                                                                                                                                                                         |                                                 |                                                                      |
| Mustanski et al, 2011 [14] | Mixed<br>methods;<br>Cross-<br>sectional                   | None                                                                                                        | Convenience and purposive<br>sampling across multiple sites      | Survey; Interviews                                                                                                                                                                                                      | Descriptive analysis<br>(inductive approach)    | Self-report; Limited<br>generalizability                             |
| Rushing et al, 2011 [15]   | Quantitative;<br>Cross-<br>sectional                       | American Indian/<br>American Native<br>Health Disparities<br>and Wellness Model                             | Convenience sampling                                             | Survey                                                                                                                                                                                                                  | Descriptive statistics;<br>Chi-square analysis  | Self-report; Limited<br>generalizability                             |
| Buhi et al, 2009 [16]      | Quantitative<br>and<br>qualitative;<br>Cross-<br>sectional | None                                                                                                        | Convenience and purposive<br>sampling at a single site (college) | Online survey using<br>investigator-developed<br>questionnaires; Observation<br>(verbal report using "talking<br>out loud" method)                                                                                      | Descriptive statistics;<br>descriptive analysis | Self-report; limited<br>generalizability<br>because of single site   |
| Tercyak et al, 2009 [17]   | Quantitative;<br>Correlational                             | Problem behavior<br>theory; theory of<br>planned behavior                                                   | Convenience sampling at a single<br>site (hospital)              | Survey; self-report using<br>Adolescent eHealth<br>Promotion Scale, National<br>Centers for Disease Control<br>and Prevention's Youth Risk<br>Behavior Survey, Center for<br>Epidemiologic Studies-<br>Depression Scale | Multivariate linear<br>regression               | Self-report and self-<br>selection bias; limited<br>generalizability |
| Ybarra et al, 2008 [18]    | Quantitative;<br>Cross-<br>sectional                       | None                                                                                                        | Random sampling across multiple<br>sites (five schools)          | Survey                                                                                                                                                                                                                  | Logistic regression                             | Self-report                                                          |

|                                                        |                                                    |                                |                                                                                |                                             |                                                                               |                                                                                                           |
|--------------------------------------------------------|----------------------------------------------------|--------------------------------|--------------------------------------------------------------------------------|---------------------------------------------|-------------------------------------------------------------------------------|-----------------------------------------------------------------------------------------------------------|
| Nwagwu, 2007 [19]                                      | Quantitative;<br>Cross-sectional;<br>Correlational | Uses and gratifications theory | Random sampling across multiple sites (22 schools and community organizations) | Survey; Investigator-modified questionnaire | Descriptive statistics, chi-square and <i>t</i> tests;<br>Regression analysis | Limited generalizability because of incomparability of proportions of in-school and out-of-school samples |
| Abbreviations: AI/AN, American Indian, American Native |                                                    |                                |                                                                                |                                             |                                                                               |                                                                                                           |

## References

1. Manganello JA, Sojka CJ. An exploratory study of health literacy and African American adolescents. *Compr Child Adolesc Nurs* 2016 Jul;39(3):221-239. doi: 10.1080/24694193.2016.1196264
2. Johnson KR, Fuchs E, Horvath KJ, Scal P. Distressed and looking for help: Internet intervention support for arthritis self-management. *J Adolesc Health* 2015 Feb;56(6):666-671. doi:10.1016/j.jadohealth.2015.02.019. PMID:26003583
3. Wetterlin FM, Mar MY, Neilson EK, Werker GR, Krausz M. eMental health experiences and expectations: a survey of youths' Web-based resource preferences in Canada. *J Med Internet Res* 2014 Dec;16(12):e293. doi:10.2196/jmir.3526. PMID:25519847
4. Fergie G, Hunt K, Hilton S. What young people want from health-related online resources: a focus group study. *J Youth Stud* 2013 Aug;16(5):579-596. doi:10.1080/13676261.2012.744811. PMID:24748849
5. Henderson EM, Keogh E, Rosser BA, Eccleston C. Searching the Internet for help with pain: adolescent search, coping, and medication behaviour. *Br J Health Psychol* 2013 Feb;18(1):218-232. doi:10.1111/bjhp.12005. PMID:23126577
6. Nordfeldt S, Angarne-Lindberg T, Nordwall M, Ekberg J, Bertero C. As facts and chats go online, what is important for adolescents with type 1 diabetes? *PLoS One* 2013 Jun 21;8(6):e67659. doi:10.1371/journal.pone.0067659. PMID:23805322
7. Neumark Y, Lopez-Quintero C, Feldman BS, Hirsch Allen AJ, Shtarkshall R. Online health information seeking among Jewish and Arab adolescents in Israel: results from a national school survey. *J Health Commun* 2013;18(9):1097-1115. doi: 10.1080/10810730.2013.778360. PMID: 23829662
8. Stephens R, Ryan FS, Cunningham SJ. Information-seeking behavior of adolescent orthodontic patients. *Am J Orthod Dentofacial Orthop* 2013 Mar;143(3):303-309. doi:10.1016/j.ajodo.2012.10.018. PMID:23452963
9. Gaskin GL, Longhurst CA, Anoshiravani A. Internet access and attitudes toward online personal health information among detained youth. *Pediatrics* 2012 Nov;130(5):914-17. doi:10.1542/peds.2012-1653. PMID:23090346
10. Magee JC, Bigelow L, Dehaan S, Mustanski BS. Sexual health information seeking online: a mixed-methods study among lesbian, gay, bisexual, and transgender young people. *Health Educ Behav* 2012 Jun;39(3):276-289. doi:10.1177/1090198111401384. PMID: 21490310
11. Ghaddar SF, Valerio MA, Garcia CM, Hansen L. Adolescent health literacy: the importance of credible sources for online health information. *J Sch Health* 2012 Jan;82(1):28-36. doi:10.1111/j.1746-1561.2011.00664.x. PMID:22142172
12. Selkie EM, Benson M, Moreno M. Adolescents' views regarding uses of social networking Websites and text messaging for adolescent sexual health education. *Am J Health Educ* 2011 Jul;42(4):205-12. PMID:22229150

13. Barman-Adhikari A, Rice E. Sexual health information seeking online among runaway and homeless youth. *J Soc Social Work Res* 2011 Jun;2(2):88-103. doi:[10.5243/jsswr.2011.5](https://doi.org/10.5243/jsswr.2011.5). PMID: 22247795
14. Mustanski B, Lyons T, Garcia SC. Internet use and sexual health of young men who have sex with men: a mixed-methods study. *Arch Sex Behav* 2011;40(2):289-300. doi: 10.1007/s10508-009-9596-1. PMID: 20182787
15. Rushing SC, Stephens D. Use of media technologies by Native American teens and young adults in the Pacific Northwest: exploring their utility for designing culturally appropriate technology-based health interventions. *J Prim Prev* 2011;32(3-4):135-145. doi:10.1007/s10935-011-0242-z. PMID: 21805055
16. Buhi ER, Daley EM, Fuhrmann HJ, Smith SA. An observational study of how young people search for online sexual health information. *J Am Coll Health* 2009 Sep-Oct;58(2):101-11. doi:10.1080/07448480903221236. PMID:19892646
17. Tercyak KP, Abraham AA, Graham AL, Wilson LD, Walker LR. Association of multiple behavioral risk factors with adolescents' willingness to engage in eHealth promotion. *J Pediatr Psychol* 2009 Jun;34(5):457-469. doi:10.1093/jpepsy/jsn085. PMID:18723566
18. Ybarra ML, Emenyonu N, Nansera D, Kiwanuka J, Bangsberg DR. Health information seeking among Mbararan adolescents: results from the Uganda Media and You survey. *Health Educ Res* 2008 Apr;23(2):249-258. doi:[10.1093/her/cym026](https://doi.org/10.1093/her/cym026). PMID: 17639121
19. Nwagwu WE. The Internet as a source of reproductive health information among adolescent girls in an urban city in Nigeria. *BMC Public Health* 2007 Dec;7(1):354. doi:10.1186/1471-2458-7-354. PMID:18096032
